# Common Data Elements, Scalable Data Management Infrastructure and Analytics Workflows for Large-scale Neuroimaging Studies

Rayus Kuplicki<sup>1#</sup>, James Touthang<sup>1</sup>, Obada Al Zoubi<sup>1</sup>, Ahmad Mayeli<sup>1</sup>, Masaya Misaki<sup>1</sup>,  
NeuroMAP-Investigators<sup>1,2</sup>, Robin L Aupperle<sup>1,2</sup>, T. Kent Teague<sup>3,4,5</sup>, Brett A. McKinney<sup>6,7</sup>,  
Martin Paulus<sup>1</sup>, and Jerzy Bodurka<sup>1,8#</sup>

<sup>1</sup>Laureate Institute for Brain Research, Tulsa, OK, USA

<sup>2</sup>Department of Community Medicine, Oxley Health Sciences, University of Tulsa, Tulsa, OK, USA

<sup>3</sup>Department of Surgery, University of Oklahoma School of Community Medicine, Tulsa, OK, USA

<sup>4</sup>Department of Psychiatry, University of Oklahoma School of Community Medicine, Tulsa, OK, USA

<sup>5</sup>Department of Biochemistry and Microbiology, Oklahoma State University Center for Health Sciences, Tulsa, OK, USA

<sup>6</sup>Department of Mathematics, University of Tulsa, Tulsa, OK, USA,

<sup>7</sup>Tandy School of Computer Science, University of Tulsa, OK, USA

<sup>8</sup>Stephenson School of Biomedical Engineering, University of Oklahoma, Norman, OK, USA

#Corresponding authors:

Dr. Rayus Kuplicki; email: [rkuplicki@laureateinstitute.org](mailto:rkuplicki@laureateinstitute.org)

Dr. Jerzy Bodurka; email: [jbodurka@laureateinstitute.org](mailto:jbodurka@laureateinstitute.org)

27

28 **Key Words:** Human Brain, Neuroimaging, multi-level assessment, large-scale studies,  
29 common data elements, data processing pipelines, scalable analytic workflows, BIDS format.

30

31

32

## 33 **1. Abstract**

34 Neuroscience studies require considerable bioinformatic support and expertise. Numerous  
35 high-dimensional and multimodal datasets must be preprocessed and integrated to create  
36 robust and reproducible analysis pipelines. We describe a common data elements and  
37 scalable data management infrastructure that allows multiple analytics workflows to facilitate  
38 preprocessing, analysis and sharing of large-scale multi-level data. The process uses the Brain  
39 Imaging Data Structure (BIDS) format and supports MRI, fMRI, EEG, clinical and laboratory  
40 data. The infrastructure provides support for other datasets such as Fitbit and flexibility for  
41 developers to customize the integration of new types of data. Exemplar results from 200+  
42 participants and 11 different pipelines demonstrate the utility of the infrastructure.

43

44

## 45 **2. Introduction**

46 Neuroimaging studies such as ABCD, ADNI, Human Connectome, and Tulsa 1000 studies are  
47 significant contributors to the rapid growth of big data (Leow et al., 2009; Van Essen et al.,  
48 2013; Jernigan et al., 2018; Victor et al., 2018). In addition to the usual high-dimensional data  
49 that accompany clinical studies (e.g., genetic, cellular and clinical assessments), neuroscience  
50 studies include multimodal data for the brain (e.g., MRI, Perfusion MRI [pMRI], diffusion MRI  
51 [dMRI], functional MRI [fMRI] and Electroencephalography [EEG]). The use of various data  
52 acquisition modalities and differences in studies' experimental designs make it challenging to  
53 provide a common data architecture that would offer easy access, scalability, management  
54 and sharing, including the ability to build analytic workflows and to run large scale analyses  
55 with increasingly large numbers of subjects. Here, we propose possible solutions to these  
56 challenges and described our specific working implementation.

57 As a part of the Neuroscience-Based Mental Health Assessment and Prediction (NeuroMAP)  
58 Center of Biomedical Research Excellence (CoBRE) award from National Institute of General  
59 Medical Sciences (NIGMS/NIH), the NeuroMAP Research Core provides research  
60 infrastructure to conduct advanced neuroscience research and also is responsible for providing  
61 active data management and analysis support, which includes standardization of all acquired  
62 data. Data collected for NeuroMAP consist of a core baseline assessment as well as  
63 subsequent individual projects sharing various common data elements. The research core  
64 protocol contains neuroimaging (e.g., MRI/pMRI/dMRI/fMRI/EEG), behavioral, self-report,  
65 biomarker, and actigraphy data acquired from large cohorts of participants who are then  
66 enrolled in the various other projects. Ongoing human recruitment into the core protocol is

67 roughly 100 participants per year in phase I (five years, with a possible extension to 10 years),  
68 so that this cohort is anticipated to reach 400+ participants. Currently at year 3, 310  
69 participants have been enrolled. A large and growing cohort size combined with several  
70 acquisition modalities amounts to a large and increasing set of heterogenous and complex  
71 data.

72 Large-scale data collection pipelines are complex to establish while maintaining standardized  
73 experimental protocols on both the data-acquisition hardware level and on the clinical data  
74 management level. Follow-up analyses also require further standardization, which is often  
75 implemented in ad hoc software systems at different institutions and may even vary between  
76 labs within an institution. Home-grown solutions can work adequately, and over the past  
77 decade we have collected neuroimaging data from thousands of individuals using our own  
78 internal solutions. However, in recent years, progress has been made in the scientific  
79 community toward consensus solutions to improve data management and mechanisms for  
80 data sharing (Gorgolewski et al., 2016).

81 There are a number of substantial costs when using custom data management solutions, not  
82 the least of which is developing the data processing standards, which can be difficult for  
83 researchers without informatics training. Idiosyncratic naming conventions and directory  
84 structures also add overhead when sharing datasets and analysis code that was developed for  
85 specific file structures. For example, a researcher unfamiliar with a particular dataset would  
86 need to learn about its conventions along with the details of the study. Sometimes, the first  
87 thing researchers do when working with a new dataset is reformat it to match a form they are  
88 familiar with, which is extra effort that could be avoided if standard formats were used.  
89 Similarly, reusing analysis code (e.g. scripts and software) often requires either extensive

90 reworking to be compatible with a new dataset, or reformatting the target data to be compatible  
91 with the existing code.

92 One possible solution is the development of a complex data management system used to  
93 store, access, and even analyze neuroimaging and associated data. There have been several  
94 projects to produce such extensive systems over the past 15 years (Marcus et al., 2007;  
95 Keator et al., 2008; Van Horn and Toga, 2009; Ozyurt et al., 2010; Das et al., 2011; Scott et  
96 al., 2011; Book et al., 2013); however, they can come with significant overhead in installation,  
97 maintenance, and user training. In fact, our institute spent considerable time and resources  
98 attempting to implement one of these systems, a project which we ultimately abandoned due  
99 to excessive cost and technical difficulties.

100 One of the main challenges is the need for a commonly accepted data structure format that  
101 would provide a consistent and standardized way to organize multi-level neuroimaging data.  
102 The Brain Imaging Data Structure (BIDS) (Gorgolewski et al., 2016) was introduced in 2016  
103 and promises to alleviate some of the difficulties in organizing, documenting and sharing data  
104 and code while maintaining a simple, intuitive structure that is easy to understand and work  
105 with. With metadata stored directly on disk, either in the form of file names and locations or  
106 associated JSON sidecars, BIDS avoids requiring overly complex management software or  
107 databases. The BIDS format is remarkably similar to our internally developed neuroimaging  
108 data organization solution and we decided to transition to BIDS for the NeuroMAP studies,  
109 common data elements and all new projects going forward. Wide acceptance of BIDS provides  
110 standardization across other datasets and facilitates sharing with the scientific community.

111

## 112 **3. Methods**

### 113 **3.1. Data Management Infrastructure Design**

114 The Common Data Elements and Scalable Data Managing Infrastructure can integrate  
115 neuroimage data with various other data types (Fig. 1). The CDE data are in general  
116 composed from multimodal MRI, fMRI, EEG, physiological recordings, behavioral measures,  
117 self-reports measures, actigraphy from wearable devices, and biospecimen samples (e.g.,  
118 blood and microbiome). Full details of the NeuroMAP core multilevel data collection are  
119 included in Supplementary Materials. All original data sources (left side of Fig. 1) are  
120 processed and stored in order to produce a BIDS-compliant dataset (right side of Fig. 1). The  
121 middle part of the figure shows intermediate steps and storage, while the right shows the final  
122 BIDS dataset. BIDS conversion of each element is described in detail in section 3.2. Colors are  
123 used to show which raw data and samples correspond to particular elements of the BIDS  
124 dataset in its final form.

125

### 126 **3.2. BIDS Conversion**

#### 127 **3.2.1. Self-report/REDCap**

128 Self-report and clinical measures (described in full in section S-1.1.1) stored in REDCap are  
129 exported into a BIDS-compliant format using the PyCap library built on top of the REDCap API.  
130 The inputs/outputs of this process appear in orange in Figure 1. In brief, an API key links a  
131 user and access rights to a single project. Data returned from REDCap include a table of  
132 subject data for the project as well as metadata about the project and data collection  
133 instruments. The data are converted to tsv format and stored in the phenotype folder following

134 BIDS specification. Similarly, the metadata describing the data collection instruments are  
135 stored in JSON formatted data dictionaries. The result is a json/tsv pair for each REDCap form.  
136 This script can be setup for other redcap projects and is available on GitHub  
137 (<https://github.com/laureate-institute-for-brain-research/redcap-to-bids>).

### 138 **3.2.2. Neuroimaging and associated physiological data**

139 Neuroimaging data are produced in two formats. Source DICOM images are reconstructed and  
140 generated by the scanner and permanently stored in a read-only central location. The default  
141 organization from GE DICOM file structure has each scan stored three-folders deep (e.g.,  
142 pXXX/eYYY/sZZZ, where p, e, and s refer to patient, exam, and series). For each completed  
143 scan and patient exam, these DICOM images are automatically extracted, transferred to  
144 scanner-dedicated local storage and reorganized by custom developed real-time MRI scanner  
145 data management software. To reduce the storage burden associated with hundreds of  
146 thousands of individual files, DICOM folders are packaged in .tar.gz format at the exam  
147 directory level. This reduces the number of individual files stored by a factor of  $10^5$ , and also  
148 saves significant storage space when individual files are smaller than the storage block size.  
149 Each DICOM image contains standard metadata indicating the subject ID, date, study, scan,  
150 and various imaging parameters: everything necessary to associate a scan with its final BIDS-  
151 compliant name and location. However, parsing through the DICOM folders and extracting  
152 metadata is an expensive operation, even before considering the compressed format. We  
153 solved this problem by creating a REDCap project called the MRI Catalogue, which contains  
154 all relevant DICOM metadata. New DICOM images from MRI scans are processed and  
155 metadata describing them are imported into REDCap nightly. Our real-time MRI software also  
156 produces a unique exam folder (on scanner-attached and dedicated real-time processing Linux  
157 workstations), which contains AFNI formatted imaging data that are uploaded and created in



158 real time from a given session, along with any associated concurrent physiological recordings  
159 (pulse oximeter, respiratory belt, pre-processed EEG), electronic documentation for each scan  
160 with imaging parameters, DICOM file count and location on the local storage after extraction  
161 from the MRI scanner host computer and image database.

162 Raw EEG data (without any preprocessing) acquired concurrent with fMRI are initially stored  
163 locally on a dedicated EEG recording computer and then synchronized and transferred to  
164 network storage nightly. Similarly, behavioral responses collected during scanning tasks are  
165 initially stored on a stimulus laptop and then moved to network storage immediately upon  
166 session completion. The decision to store data locally first, then move it to network storage  
167 was based on reliability and latency considerations, so that networking issues do not affect  
168 data collection.

169 Neuroimaging and associated physiological data are organized and converted to BIDS format  
170 by a nightly batch process. This process handles the neuroimaging and behavioral data  
171 separately. In the first step, an export of all current MRI Catalogue data necessary for  
172 organization is extracted from REDCap. The organization process parses through these data  
173 looking for project and scan IDs matching lists for a particular project. Newly acquired  
174 matching scans are converted to nii.gz format and sent to the appropriate BIDS folder with an  
175 associated JSON sidecar. Importantly, the DICOM metadata also contains a pointer to the  
176 appropriate exam folder and series number, which is used to extract the associated  
177 physiological data. Technical issues often make data collection imperfect, e.g. scans may be  
178 aborted/restarted due to participant discomfort or imaging artifacts. Therefore, quality checks  
179 take place to help maintain data fidelity. The two most relevant checks include subject and  
180 duration matching. REDCap contains a list of subjects who have been consented for each  
181 study, so any subject ID in the MRI Catalogue that does not match a consented subject for the

182 study in question is not included. This happens, for example, with technical scans, which  
183 should not appear in the final dataset. The case where scans are repeated, producing multiple  
184 scans of the same type is handled by matching on expected duration. Any scan that does not  
185 have the expected duration is discarded, since shortened duration indicates an incomplete  
186 scan.

187 The second part of the organization process handles new behavioral data found on network  
188 storage. These data are stored in a folder unique to the study and completion date/time of the  
189 session. Each behavioral folder should contain data from one subject at one visit, and any  
190 folders that contain multiple subjects or visits generate an error and are skipped until they are  
191 manually corrected. Reformatting raw behavioral data involves converting from csv to tsv,  
192 creation of a new header, and then placement in the final BIDS data structure. Raw EEG data  
193 are named according to subject ID, and quality control involves matching on subject ID,  
194 date/time, and duration, similar to what is done for imaging data.

### 195 **3.2.3. Behavioral data**

196 Data management for behavioral sessions completed outside the scanner mirrors that for the  
197 behavioral data from scanning sessions, where raw files are initially stored locally, moved to  
198 network storage at the end of the session, and then parsed/organized nightly. The behavioral  
199 session also includes physiological data acquired using Acknowledge software (BIOPAC  
200 Systems, Inc.). These data are initially stored as a single continuous file in .acq format  
201 covering the entire session. Bioread (<https://github.com/uwmadison-chm/bioread>) is used to  
202 convert to plain text format, which is then sliced into and saved as individual tsv.gz files for  
203 each task and run. Synchronization is done using the parallel port, with a unique code

204 indicating the start and end of each task. The appropriate header values are also extracted  
205 and stored in a JSON sidecar to be BIDS compliant.

#### 206 **3.2.4. Biospecimens**

207 A detailed description of initial processing and storage of biospecimens is in the supplement (S  
208 1.1.5). Final processing of the collected samples may be carried out by a contract laboratory or  
209 done in-house and produces datasets of varying size. Blood samples are used to quantify a  
210 limited number of analytes (e.g. less than 50) describing inflammatory and metabolic states.  
211 These data are parsed and imported into REDCap for permanent storage, and then later  
212 exported into BIDS format in the same way as self-report scales. Blood samples are also sent  
213 for genotyping, which produces 650,000 or more values per participant. These data are not  
214 suitable for storage in REDCap, so they are stored in a separate repository where the location  
215 and genetic descriptors are identified in the BIDS data description. Microbiome samples  
216 produce similarly large datasets through 16S sequencing or other technologies, which again  
217 are identified in the data description to be BIDS compliant and do not have permanent storage  
218 within REDCap.

#### 219 **3.2.5. Actigraphy/FitBit**

220 FitBit data are initially stored in a third-party database (Fitabase <https://www.fitabase.com/>,  
221 accessed 2/18/2021), which handles most of the overhead related to FitBit account  
222 creation/management and aggregation of many participants' data. Data exported from  
223 Fitabase may be divided into daily summaries and momentary assessments. Due to account  
224 management details, daily summary data often include time periods outside of the assessment  
225 windows for each subject. Start and end dates, entered into REDCap by the researcher  
226 deploying the FitBit, are used to trim the summary data down to the appropriate timeframe.

227 These daily summaries are stored in a single table under the phenotype folder and include  
228 overall activity levels, sleep duration and quality. Momentary assessment data including  
229 minute-wise heart rate estimates are stored in each subject's wearable folder and are in many  
230 ways similar to behavioral outputs. Fitabase provides FitBit data in four different time intervals:  
231 30 seconds, 1 minute, 1 hour, and 24 hours. 30-second interval data only includes sleep  
232 stages. Minute interval data include calories burned, activity intensity, metabolic equivalent of  
233 tasks (METs), current sleep stage, heart rate, and number of steps. One-hour interval data  
234 include calories burned, activity intensity, and number of steps. 24-hour interval data include  
235 activity summaries, calories burned, number of steps, and sleep.

236

### 237 **3.3. Analytic Workflows**

238 Along with the conversion of raw data into BIDS format, the Research Core also provides a set  
239 of analysis pipelines, training, and support.

#### 240 **3.3.1. Environment**

241 All data and analyses are hosted and completed on-site, providing full control of the systems'  
242 configuration and operation. Our specific implementation of the primary data storage is  
243 accomplished using a network attached storage cluster running the open-source Ceph file  
244 system (CephFS). We would like to note that any modern storage hardware/solution and/or  
245 mixed local storage with cloud storage should provide alternative option for another site  
246 implementation. We selected CephFS as a scalable solution installed on commodity hardware,  
247 which allows administrators to add storage incrementally without rebuilding the entire cluster  
248 like some other solutions require. Performance scales with the size of the cluster, as data are

249 not accessed through a fixed set of head nodes. LIBR currently has 2 petabytes of raw  
250 storage, which is 1PB of usable space after data duplication. Additionally, there is a full off-site  
251 backup copy stored roughly 100 miles away on an identical Ceph cluster. As a final precaution,  
252 LIBR also sends periodic tape backups to Iron Mountain using a Spectra BlackPearl appliance.  
253 LIBR has 8 high-performance servers configured with the slurm workload manager  
254 (<https://slurm.schedmd.com/>). Each server has 24 physical cores, allowing up to 192 jobs to  
255 run in parallel and a total of over 24,000 GFlops/second. Jobs optimized to run on GPUs can  
256 take advantage of 4 Nvidia Tesla P100 cards, providing an additional 75,200 GFlops/second of  
257 computing power. Nodes are configured with 187 or 376 GB of RAM and overall networking  
258 throughput is 320 Gbps. This centralized processing infrastructure helps mitigate the  
259 bottleneck associated with network attached storage by providing 40 Gbps connections, which  
260 far outperform standard 1Gbps connections used in modern ethernet.

261 The storage and computing infrastructure just described was designed and developed  
262 incrementally to balance cost with performance, security, and overhead for training and  
263 maintenance. As we noted above, our data organization and processing workflows, however,  
264 do not depend on the physical details of our environment and could be implemented on a  
265 variety of systems or in the cloud.

### 266 **3.3.2. Pipeline Architecture Overview**

267 Subject and group level analyses are conducted separately. Processing pipelines are  
268 implemented to service an individual subject and analysis, where an analysis typically deals  
269 with one task and set of processing parameters (Fig. 2). This allows for parallelization at the  
270 subject plus pipeline level, with separate jobs submitted for each subject.

271

272 All single-subject analyses are submitted to the batch scheduler using a script named  
273 preprocess-all-BIDS.py. This wrapper reads in a configuration file with pointers to the root of  
274 the source data directory (i.e., the root of one BIDS dataset), the desired root of the output  
275 directory tree and which pipeline to run. The output directory structure mirrors the BIDS  
276 formatted input, so that individual subject/session/pipeline results are stored in [Results  
277 Root]/sub-[subject]/ses-[session]/[leaf]. preprocess-all-BIDS.py traverses the input folder  
278 structure, and for every subject/session checks to see if a job has already been submitted,  
279 based on the existence of specially named status-indicating files in the output directory. If this  
280 subject/session combination has not been run for this pipeline, the output directory is created  
281 and a job is submitted.

282 Results for an individual subject/session/task/pipeline include derived values to be tabulated,  
283 quality control images in png or jpg format, and larger format derived data, like voxelwise  
284 statistics. Derived values include metrics like subject head motion, subject performance  
285 including mean reaction times and accuracy, physiological measures including heart rate, and  
286 in the case of imaging tasks, extracted activations, contrasts, and volumes from atlas-based  
287 regions of interest. All derived values are stored in files ending in the .longformat suffix, where  
288 these are simple text files in attribute-value format. After processing data for all subjects, all  
289 values found in .longformat files are combined, producing a consolidated table with a single  
290 row per subject and session and one column per attribute. This consolidated format, ready for  
291 use in various statistics applications, is saved as in .csv and, RData formats, the later binary  
292 being preferable for large imaging datasets with tens of thousands of variables, which can lead  
293 to performance issues when reading in text data.

294 Any manual quality control processes are simplified by storing appropriate images in jpg or png  
295 format. For examples, this may include EKG traces with identified R wave peaks, or montages

296 showing alignment and normalization of neuroimaging data. This allows the user to flip through  
297 QC images for a dataset relatively quickly without, for example, needing to open neuroimaging  
298 data in specialized software.

### 299 **3.3.3. Neuroimaging Pipeline Options**

300 fMRI Pipelines. Neuroimaging processing pipelines necessarily include numerous decisions,  
301 such as which software to use, whether to include linear or non-linear normalization to  
302 standard space, what smoothing kernel to apply, what nuisance regressors to use at the  
303 regression step and so on. These analysis decisions can impact the final results and  
304 interpretation of a study, which was recently illustrated through divergent results obtained by  
305 70 independent groups of researchers who all analyzed the same data (Botvinik-Nezer et al.,  
306 2020). Therefore, frameworks like ours that allow the sharing of analysis workflows are  
307 essential for reproducibility and replicability. An individual researcher may customize a  
308 particular pipeline or use one of our 3 standard options for each fMRI task, labeled P01  
309 through P03. P01 is a traditional approach using AFNI (Cox and Hyde, 1997) and includes  
310 removal of the first 3 volumes, despiking, slice-timing correction, co-registration between  
311 functional and structural volumes, motion correction, 4mm of gaussian blur, and an affine  
312 transformation to standard space. P02 is similar to P01, except that it includes a non-linear  
313 warp to standard space and RETROICOR correction (Glover et al., 2000), which helps remove  
314 physiological noise but requires the collection of pulse oximeter and respiratory belt data.  
315 P03 takes a completely different approach, instead using fMRIPrep (Esteban et al., 2019) to do  
316 all preprocessing up until the regression step, which still uses AFNI's 3dDeconvolve.  
317 Preprocessing with fMRIPrep uses mainly default parameters, so that a combination of tools  
318 are used to 1) select a reference fMRI volume (mean of high contrast available in initial pre T1-

319 saturation or pre Steady State Free Precession fMRI volume); 2) perform boundary based  
320 registration with the T1-weighted images (Greve and Fischl, 2009); 3) estimate head motion  
321 prior to any spatiotemporal filtering using mcflirt in FSL 5.0.9 (Jenkinson et al., 2002); 4)  
322 perform slice timing correction using AFNI (Cox and Hyde, 1997); 5) perform nuisance  
323 regression including regressors for Framewise Displacement and DVARS (Power et al., 2014);  
324 average CSF, white matter, and whole brain signals, as well as physiological regressors using  
325 CompCor (Behzadi et al., 2007). Regardless of the pipeline, standard derived data from task-  
326 based fMRI include regression coefficients and contrasts extracted for each ROI in several  
327 atlases and summaries of head motion for quality control.

328 Resting state preprocessing P04 pipeline includes the same options as task data, with the  
329 addition of a fourth option, which is similar to P02 pipeline but also includes additional motion  
330 correction prior to slice timing correction via an automatic EEG assisted slice-specific motion  
331 correction for fMRI (aEREMCOR) (Wong et al., 2016). While it would be possible to include  
332 this additional motion correction step for task-based data, it is particularly important in resting  
333 state, where the residual effects of head motion are well known, and they might differ for each  
334 acquired slice (Power et al., 2015). Standard derived data from resting-state fMRI include a  
335 correlation matrix between pairs of ROIs from multiple atlases (e.g. the Brainnetome (Fan et  
336 al., 2016)) and summaries of head motion.

337 EEG pipelines: Simultaneous EEG-fMRI offers several benefits to measure and study the  
338 human brain's spatial and temporal dynamics in health and disease. However, EEG data  
339 collected during fMRI acquisition are contaminated with MRI gradients and ballistocardiogram  
340 artifacts, in addition to artifacts of physiological origin (eye blinks, muscle, motion), these  
341 artifacts need to be detected and suppressed before further data analysis (Mayeli et al., 2019).  
342 We have developed in house a comprehensive automated pipeline for EEG artifact reduction



343 (APPEAR) recorded during fMRI, which we have incorporated into the BIDS preprocessing  
344 pipeline architecture (Fig. 2). APPEAR is capable of reducing all main EEG artifacts, including  
345 MRI gradients, BCG, eye blinks, muscle, and motion artifacts, and can be applied to large (i.e.,  
346 hundreds of subjects) EEG-fMRI datasets. APPEAR was evaluated, tested and compared to  
347 manual pre-processing EEG data for both resting EEG-fMRI recording as well as for event-  
348 related potential or task-based EEG-fMRI experiments in an exemplar eight subject EEG-fMRI  
349 dataset.

## 350 **4. Results**

351 We provide examples illustrating pipelines P01 through P04 to help demonstrate the utility of  
352 the processing infrastructure.

### 353 **4.1. Task fMRI Results**

354 Exemplar CDE data have been processed for the Monetary Incentive Delay and Stop Signal  
355 tasks (see the supplementary material for tasks details). Figure 3a shows voxel-wise maps for  
356 the P5 - P0 contrast in the MID as produced by pipelines P01 through P03. Data from 93  
357 participants are included here, with pipelines P01 through P03 taking approximately 1.3, 4, and  
358 5 CPU hours per subject to complete. With the architecture detailed in 3.3.2, processing for all  
359 three sets of data could be completed in under one day when all resources are available. The  
360 alignment QC images produced by each pipeline make it possible to complete all manual QC  
361 for roughly 100 participants and one pipeline in less than one hour. Figure 3b shows voxelwise  
362 maps of the Stop – NoStop contrast from the stop signal task, again produced by pipelines  
363 P01 through P03. These maps include data from 49 participants.

364

365

## 366 **4.2. Resting State fMRI Results**

367 Exemplar CDE data have also been processed for resting-state fMRI using all four pipelines,  
368 P01-P04. Figure 4a shows the average connectivity matrix extracted from the Brainnetome  
369 atlas and organized by approximate networks identified using the Yeo 7-network atlas (Yeo et  
370 al., 2011). All pipelines produce qualitatively similar results at the group level.

371

372

373

374

375 Figure 5 shows the relationship between individual features (correlation strengths) measured  
376 with different pipelines. Points on the 45 degree line indicate complete agreement between  
377 methods, while divergence from that line illustrates differences between pipelines.

378

379

380

### 381 **4.3. EEG Preprocessing**

382 We have utilized the APPEAR pipeline to preprocess EEG data acquired concurrently with  
383 fMRI, and then applied comprehensive EEG feature extraction from five subsets of EEG  
384 features including amplitude, connectivity, fractal dimension (FD), range and spectral power  
385 features. Furthermore, each subset of features was applied to Alpha [8-13] Hz, Beta[15-30] Hz,  
386 Theta[4-7] Hz, Delta[0.5-4] Hz, Gamma [30-40] Hz and whole range of EEG frequency [0.5-40]  
387 Hz. An exemplar EEG feature correlation matrix is shown in Figure 6. The exemplar use of the  
388 extracted EEG features and automated EEG preprocessing can found elsewhere  
389 [[https://github.com/obada-alzoubi/Comprehensive\\_EEG\\_Features\\_Extraction](https://github.com/obada-alzoubi/Comprehensive_EEG_Features_Extraction)].

390

### 391 **5. 4. Discussion**

392 The proliferation of high-throughput data-generating technologies in biomedical research has  
393 led to data analytics challenges for creating easily reusable and reproducible pipelines. These  
394 challenges are especially salient for neuroscience studies, which not only involve the usual  
395 high-dimensional data but also include multiple neuroimage-specific data types and complex  
396 psychological trait data. The current study describes a scalable environment and set of  
397 software pipelines to preprocess neuroimaging (MRI, fMRI, and EEG) and behavioral data  
398 while integrating them with other subject-level high-dimensional data to perform sharable,  
399 reproducible analyses.

400 The services and computational environment developed by the Research Core provide a set of  
401 tangible benefits to ongoing research. Massive amounts of complex neuroimaging data are put

402 into a standard (BIDS) format with minimal human interaction in an ongoing basis. The  
403 architecture for converting data to BIDS format is flexible and scalable, so that new studies  
404 often have compliant data from day 1.

405 Once the data for a study are in BIDS format, running any of our standard preprocessing  
406 pipelines becomes a quick process. With relatively little human intervention, preprocessing  
407 jobs can be created for hundreds or thousands of participants, and the processing and network  
408 storage infrastructure can produce results in days rather than weeks. Having multiple pipelines  
409 available for the same tasks gives researchers the ability to verify that their results are robust  
410 to the details of the preprocessing pipeline, as others have shown the wide variation in  
411 analysis results to be a serious concern (Botvinik-Nezer et al., 2020).

412 In this work, we provide exemplar results 11 different pipelines (3 pipelines on each of 2 fMRI  
413 tasks, 4 pipelines on resting-state fMRI, and one pipeline on resting EEG) to demonstrate the  
414 utility of our infrastructure. Additionally, ROI-level results from our standard pipelines have  
415 been used in studies of cannabis (Spechler et al., 2020) and stimulant/opioid use (Stewart et  
416 al., 2020), while voxelwise results have appeared in studies of neighborhood effects (Feng et  
417 al., 2019) and inflammation (Burrows et al., 2021), and clinical data have been used to predict  
418 head motion during scanning (Ekhtiari et al., 2019). We have also used EEG derived features  
419 have to differentiate participants with mood and anxiety disorders from healthy controls (Al  
420 Zoubi et al., 2019) and to predict participant age (Al Zoubi et al., 2018).

421 Our workflow incorporates many diverse processing and analysis tools such as afni, freesurfer,  
422 fmriprep and uses the BIDS format. However, it has been noted that the large number of  
423 analysis degrees of freedom in neuroscience increases the risk of false discoveries due  
424 (Wicherts et al., 2016). Each analysis step can result in an expanding decision tree of potential  
425 analyses. Determining the best workflow software or pipeline option for a given experiment is

426 an ongoing question, but the current software provides standard selections for the many  
427 analysis options. As the field evolves and standards consolidate, the default processing and  
428 analysis parameters will converge to standards with lower variation and increased replicability.  
429 In addition to neuroimaging data, our current pipelines include other common data types and  
430 can be easily extended to other high-throughput data, such as genetic and gene expression.  
431 Many neuroscience studies also include large non-neuroimage datasets, such as GWAS,  
432 which has its own relatively complex file format known as Plink. BIDS is opensource and under  
433 active development, and integration with these other datasets will be straightforward  
434 extensions of BIDS.

435

## 436 **6. Ethics and Dissemination**

437 Human neuroimaging data were acquired as part of NeuroMap CoBRE Award from National  
438 Institute of General Medical Sciences, National Institutes of Health P20GM121312 award. The  
439 NeuroMap CoBRE Research Core IRB protocol (WIRB protocol number 20182352) was  
440 approved by the Western Institutional Review Board, Puyallup, WA. In addition all individual  
441 NeuroMap Investigators studies' protocols were approved by the Western Institutional Review  
442 Board, Puyallup, WA. All human research was conducted according to the principles  
443 expressed in Declaration of Helsinki. All subjects gave written informed consent to participate  
444 in the study and received financial compensation.

## 445 **Conflict of Interest**

446 The authors declare that the research was conducted in the absence of any commercial or  
447 financial relationships that could be construed as a potential conflict of interest.

448

449 **Funding**

450 This work was supported by National Institute of General Medical Sciences, National Institutes  
451 of Health P20GM121312 award, and in part by in part by W81XWH-12-1-0697 award from the  
452 U.S. Department of Defense, the Laureate Institute for Brain Research (LIBR), and the William  
453 K. Warren Foundation. The funding agencies were not involved in the design and  
454 development, data collection and analyses, and preparation and submission of the manuscript.

455

456

457 **Acknowledgments**

458 We thank Dr. Jennifer Stewart for valuable training contributions for NeuroMap-Investigators.  
459 The NeuroMAP-Investigators include the following contributors: Yoon Hee-Cha MD., Justin  
460 Feinsten Ph.D., Sahib Khalsa MD., Jonathan Savitz Ph.D., Kyle Simmons Ph.D., Namik Kiric  
461 Ph.D., Maria Ironside Ph.D., Evan White Ph.D.

462

463

464

465

466 **References:**

467

468

- 469 Al Zoubi, O., Ki Wong, C., Kuplicki, R.T., Yeh, H.W., Mayeli, A., Refai, H., et al. (2018). Predicting Age From Brain  
470 EEG Signals-A Machine Learning Approach. *Front Aging Neurosci* 10, 184. doi:  
471 10.3389/fnagi.2018.00184.
- 472 Al Zoubi, O., Mayeli, A., Tsuchiyagaito, A., Misaki, M., Zotev, V., Refai, H., et al. (2019). EEG Microstates Temporal  
473 Dynamics Differentiate Individuals with Mood and Anxiety Disorders From Healthy Subjects. *Front Hum*  
474 *Neurosci* 13, 56. doi: 10.3389/fnhum.2019.00056.
- 475 Behzadi, Y., Restom, K., Liau, J., and Liu, T.T. (2007). A component based noise correction method (CompCor) for  
476 BOLD and perfusion based fMRI. *Neuroimage* 37(1), 90-101. doi: 10.1016/j.neuroimage.2007.04.042.
- 477 Book, G.A., Anderson, B.M., Stevens, M.C., Glahn, D.C., Assaf, M., and Pearlson, G.D. (2013). Neuroinformatics  
478 Database (NiDB)--a modular, portable database for the storage, analysis, and sharing of neuroimaging  
479 data. *Neuroinformatics* 11(4), 495-505. doi: 10.1007/s12021-013-9194-1.
- 480 Botvinik-Nezer, R., Holzmeister, F., Camerer, C.F., Dreber, A., Huber, J., Johannesson, M., et al. (2020). Variability  
481 in the analysis of a single neuroimaging dataset by many teams. *Nature* 582(7810), 84-88. doi:  
482 10.1038/s41586-020-2314-9.
- 483 Burrows, K., Stewart, J.L., Kuplicki, R., Figueroa-Hall, L., Spechler, P.A., Zheng, H., et al. (2021). Elevated  
484 peripheral inflammation is associated with attenuated striatal reward anticipation in major depressive  
485 disorder. *Brain, Behavior, and Immunity*. doi: <https://doi.org/10.1016/j.bbi.2021.01.016>.
- 486 Cox, R.W., and Hyde, J.S. (1997). Software tools for analysis and visualization of fMRI data. *NMR Biomed* 10(4-5),  
487 171-178. doi: 10.1002/(sici)1099-1492(199706/08)10:4/5<171::aid-nbm453>3.0.co;2-l.
- 488 Das, S., Zijdenbos, A.P., Harlap, J., Vins, D., and Evans, A.C. (2011). LORIS: a web-based data management system  
489 for multi-center studies. *Front Neuroinform* 5, 37. doi: 10.3389/fninf.2011.00037.
- 490 Ekhtiari, H., Kuplicki, R., Yeh, H.W., and Paulus, M.P. (2019). Physical characteristics not psychological state or  
491 trait characteristics predict motion during resting state fMRI. *Sci Rep* 9(1), 419. doi: 10.1038/s41598-  
492 018-36699-0.
- 493 Esteban, O., Markiewicz, C.J., Blair, R.W., Moodie, C.A., Isik, A.I., Erramuzpe, A., et al. (2019). fMRIPrep: a robust  
494 preprocessing pipeline for functional MRI. *Nature methods* 16(1), 111-116.
- 495 Fan, L., Li, H., Zhuo, J., Zhang, Y., Wang, J., Chen, L., et al. (2016). The Human Brainnetome Atlas: A New Brain  
496 Atlas Based on Connectional Architecture. *Cereb Cortex* 26(8), 3508-3526. doi: 10.1093/cercor/bhw157.
- 497 Feng, C., Forthman, K.L., Kuplicki, R., Yeh, H.W., Stewart, J.L., and Paulus, M.P. (2019). Neighborhood affluence is  
498 not associated with positive and negative valence processing in adults with mood and anxiety disorders:  
499 A Bayesian inference approach. *Neuroimage Clin* 22, 101738. doi: 10.1016/j.nicl.2019.101738.
- 500 Glover, G.H., Li, T.Q., and Ress, D. (2000). Image-based method for retrospective correction of physiological  
501 motion effects in fMRI: RETROICOR. *Magn Reson Med* 44(1), 162-167. doi: 10.1002/1522-  
502 2594(200007)44:1<162::aid-mrm23>3.0.co;2-e.
- 503 Gorgolewski, K.J., Auer, T., Calhoun, V.D., Craddock, R.C., Das, S., Duff, E.P., et al. (2016). The brain imaging data  
504 structure, a format for organizing and describing outputs of neuroimaging experiments. *Sci Data* 3,  
505 160044. doi: 10.1038/sdata.2016.44.
- 506 Greve, D.N., and Fischl, B. (2009). Accurate and robust brain image alignment using boundary-based registration.  
507 *Neuroimage* 48(1), 63-72. doi: 10.1016/j.neuroimage.2009.06.060.

- 508 Jenkinson, M., Bannister, P., Brady, M., and Smith, S. (2002). Improved optimization for the robust and accurate  
509 linear registration and motion correction of brain images. *Neuroimage* 17(2), 825-841. doi:  
510 10.1016/s1053-8119(02)91132-8.
- 511 Jernigan, T.L., Brown, S.A., and Dowling, G.J. (2018). The Adolescent Brain Cognitive Development Study. *J Res*  
512 *Adolesc* 28(1), 154-156. doi: 10.1111/jora.12374.
- 513 Keator, D.B., Grethe, J.S., Marcus, D., Ozyurt, B., Gadde, S., Murphy, S., et al. (2008). A national human  
514 neuroimaging collaboratory enabled by the Biomedical Informatics Research Network (BIRN). *IEEE Trans*  
515 *Inf Technol Biomed* 12(2), 162-172. doi: 10.1109/TITB.2008.917893.
- 516 Leow, A.D., Yanovsky, I., Parikshak, N., Hua, X., Lee, S., Toga, A.W., et al. (2009). Alzheimer's disease  
517 neuroimaging initiative: a one-year follow up study using tensor-based morphometry correlating  
518 degenerative rates, biomarkers and cognition. *Neuroimage* 45(3), 645-655. doi:  
519 10.1016/j.neuroimage.2009.01.004.
- 520 Marcus, D.S., Olsen, T.R., Ramaratnam, M., and Buckner, R.L. (2007). The Extensible Neuroimaging Archive  
521 Toolkit: an informatics platform for managing, exploring, and sharing neuroimaging data.  
522 *Neuroinformatics* 5(1), 11-34. doi: 10.1385/ni:5:1:11.
- 523 Mayeli, A., Henry, K., Wong, C.K., Zoubi, O.A., White, E.J., Luo, Q., et al. (2019). Automated Pipeline for EEG  
524 Artifact Reduction (APPEAR) Recorded during fMRI. *arXiv preprint arXiv:1912.05507*.
- 525 Ozyurt, I.B., Keator, D.B., Wei, D., Fennema-Notestine, C., Pease, K.R., Bockholt, J., et al. (2010). Federated web-  
526 accessible clinical data management within an extensible neuroimaging database. *Neuroinformatics*  
527 8(4), 231-249. doi: 10.1007/s12021-010-9078-6.
- 528 Power, J.D., Mitra, A., Laumann, T.O., Snyder, A.Z., Schlaggar, B.L., and Petersen, S.E. (2014). Methods to detect,  
529 characterize, and remove motion artifact in resting state fMRI. *Neuroimage* 84, 320-341. doi:  
530 10.1016/j.neuroimage.2013.08.048.
- 531 Power, J.D., Schlaggar, B.L., and Petersen, S.E. (2015). Recent progress and outstanding issues in motion  
532 correction in resting state fMRI. *Neuroimage* 105, 536-551. doi: 10.1016/j.neuroimage.2014.10.044.
- 533 Scott, A., Courtney, W., Wood, D., de la Garza, R., Lane, S., King, M., et al. (2011). COINS: An Innovative  
534 Informatics and Neuroimaging Tool Suite Built for Large Heterogeneous Datasets. *Front Neuroinform* 5,  
535 33. doi: 10.3389/fninf.2011.00033.
- 536 Spechler, P.A., Stewart, J.L., Kuplicki, R., Tulsa, I., and Paulus, M.P. (2020). Attenuated reward activations  
537 associated with cannabis use in anxious/depressed individuals. *Transl Psychiatry* 10(1), 189. doi:  
538 10.1038/s41398-020-0807-9.
- 539 Stewart, J.L., Khalsa, S.S., Kuplicki, R., Puhl, M., Investigators, T., and Paulus, M.P. (2020). Interoceptive attention  
540 in opioid and stimulant use disorder. *Addict Biol* 25(6), e12831. doi: 10.1111/adb.12831.
- 541 Van Essen, D.C., Smith, S.M., Barch, D.M., Behrens, T.E., Yacoub, E., Ugurbil, K., et al. (2013). The WU-Minn  
542 Human Connectome Project: an overview. *Neuroimage* 80, 62-79. doi:  
543 10.1016/j.neuroimage.2013.05.041.
- 544 Van Horn, J.D., and Toga, A.W. (2009). Is it time to re-prioritize neuroimaging databases and digital repositories?  
545 *Neuroimage* 47(4), 1720-1734.
- 546 Victor, T.A., Khalsa, S.S., Simmons, W.K., Feinstein, J.S., Savitz, J., Aupperle, R.L., et al. (2018). Tulsa 1000: a  
547 naturalistic study protocol for multilevel assessment and outcome prediction in a large psychiatric  
548 sample. *BMJ Open* 8(1), e016620. doi: 10.1136/bmjopen-2017-016620.
- 549 Wicherts, J.M., Veldkamp, C.L., Augusteijn, H.E., Bakker, M., van Aert, R.C., and van Assen, M.A. (2016). Degrees  
550 of Freedom in Planning, Running, Analyzing, and Reporting Psychological Studies: A Checklist to Avoid p-  
551 Hacking. *Front Psychol* 7, 1832. doi: 10.3389/fpsyg.2016.01832.
- 552 Wong, C.-K., Zotev, V., Misaki, M., Phillips, R., Luo, Q., and Bodurka, J. (2016). Automatic EEG-assisted  
553 retrospective motion correction for fMRI (aE-REMCOR). *Neuroimage* 129, 133-147.
- 554 Yeo, B.T., Krienen, F.M., Sepulcre, J., Sabuncu, M.R., Lashkari, D., Hollinshead, M., et al. (2011). The organization  
555 of the human cerebral cortex estimated by intrinsic functional connectivity. *J Neurophysiol* 106(3), 1125-  
556 1165. doi: 10.1152/jn.00338.2011.



558 Figure Captions:

559 **Figure 1.** Common Data Elements and Scalable Data Management Infrastructure. Data  
560 generated and represented with different colors (left) are converted into the BIDS file structure  
561 (right), where colors of directories correspond to data types on left.

562 **Figure 2.** Preprocessing pipelines operate on BIDS-formatted inputs and create output in  
563 tabulated form for group level analysis. Derived data are colored to match raw data sources.

564 **Figure 3.** Exemplar voxel-wise task activation maps produced by three different pipelines. A)  
565 Monetary Incentive Delay P5 – P0 contrast from n=93 participants at  $p < 0.001$ . B) Stop Signal  
566 Stop – NoStop contrast from n=49 subjects at  $p < 0.001$ .

567 **Figure 4.** The set of group average correlation matrices from resting state with: P01 (linear  
568 registration), P02 (nonlinear registration+RETROICOR correction), P03 (fMRIPrep), P04 (P02  
569 + aEREMCOR).

570 **Figure 5.** Node-to-node correlations measured for individual subjects. Each point represents  
571 the connectivity measured for one pair of ROIs and one subject, with the X and Y values  
572 representing the connectivity measured obtained with two different pipelines. 20,000 points  
573 were randomly sampled for plotting.

574 **Figure 6.** The correlation matrix of 3032 EEG features extracted using comprehensive EEG  
575 features extraction for resting-state condition. Five different subsets of features were extracted  
576 including Amplitude (31 Channels  $\times$  5 bands  $\times$  6 types = 930 features), connectivity (24  
577 features), FD (31 Channels  $\times$  1 Feature=31), range (31 Channels  $\times$  5 bands  $\times$  8 types = 1240  
578 features) and spectral power features (31 Channels  $\times$  5 bands  $\times$  5 types + 31 Channels  $\times$  1  
579 Feature = 806 features). For more details about each subset of features, please see (Al Zoubi  
580 et al., 2018).

581

# BIDS Dataset

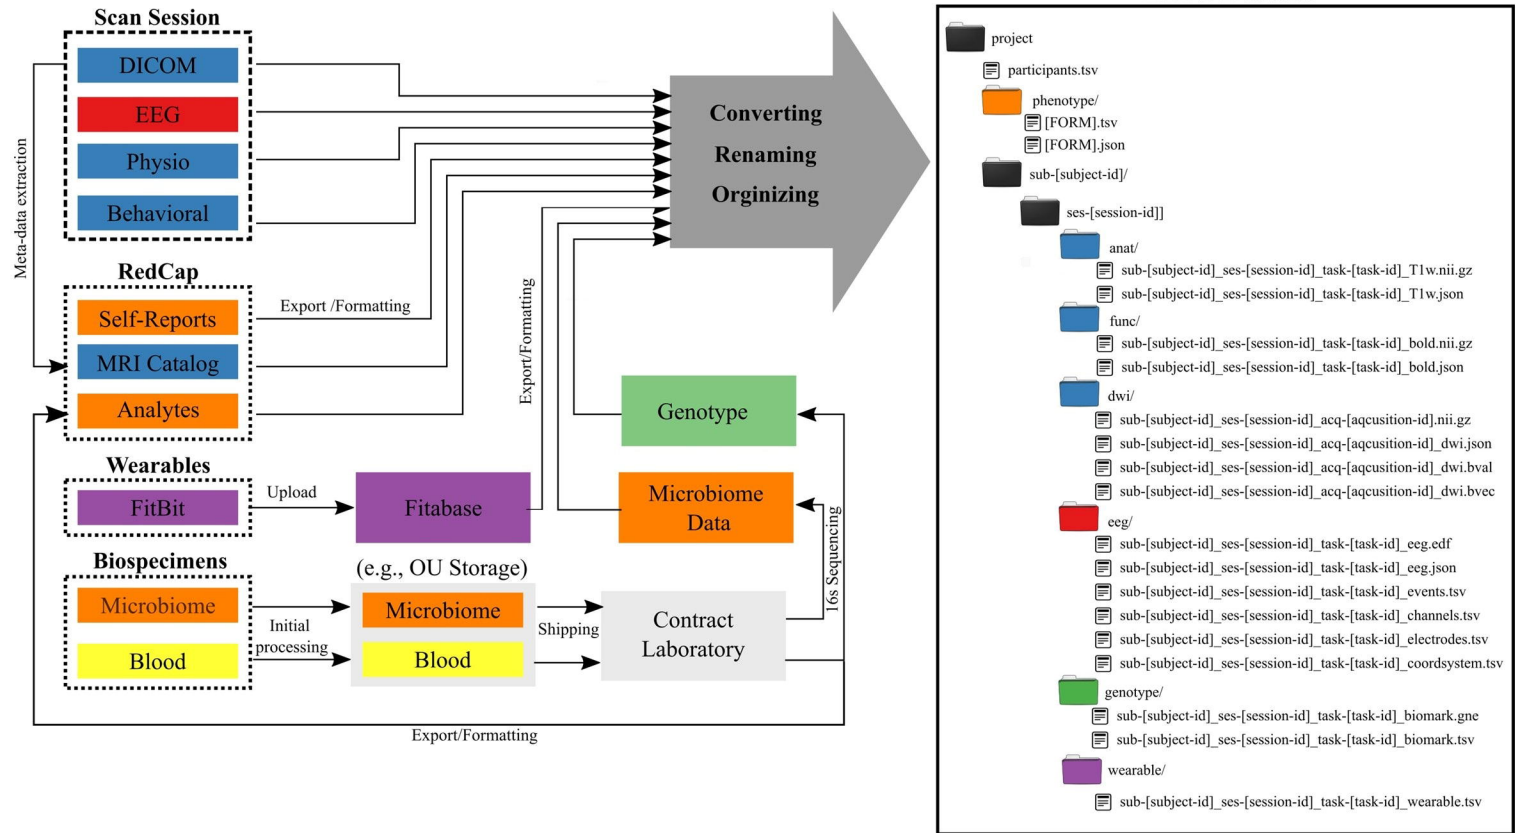

# BIDS Dataset

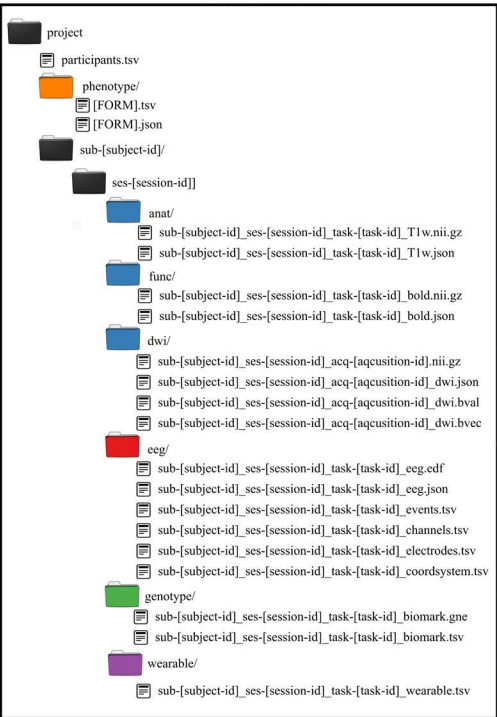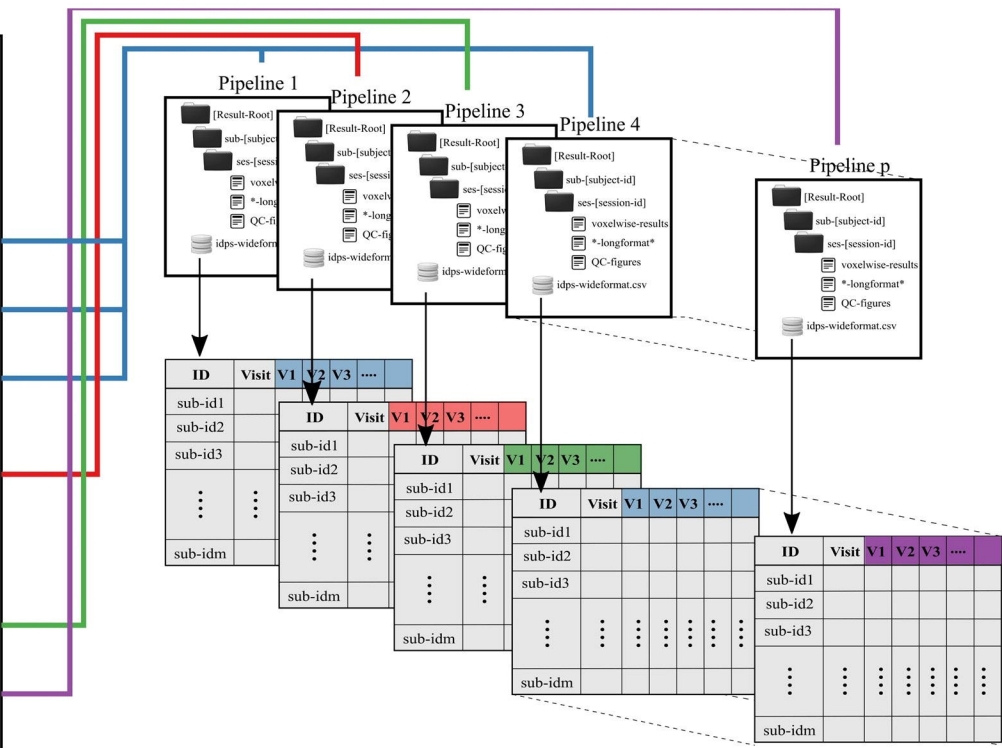

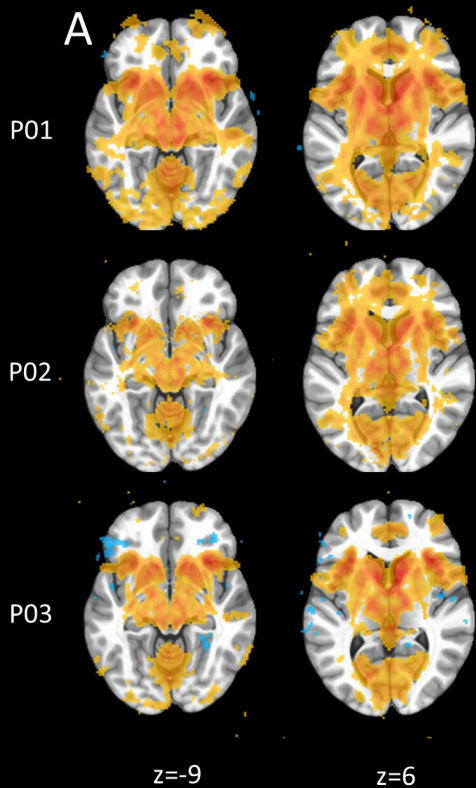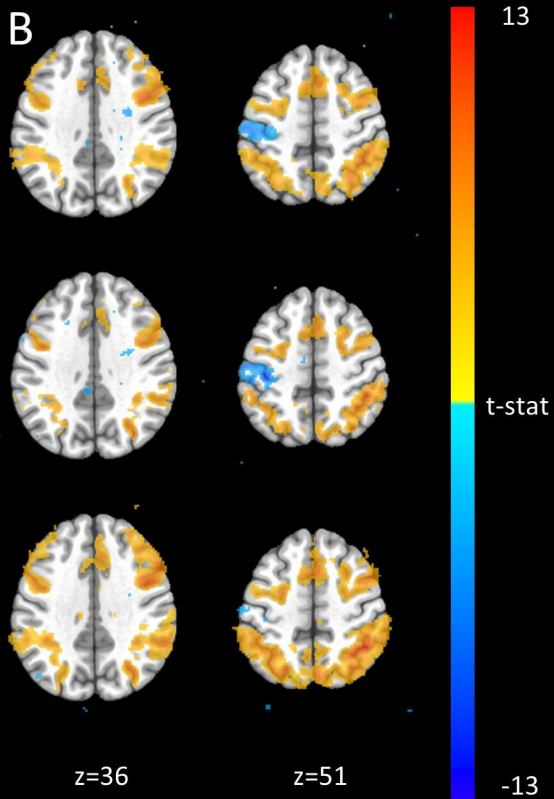



$r = 0.821$

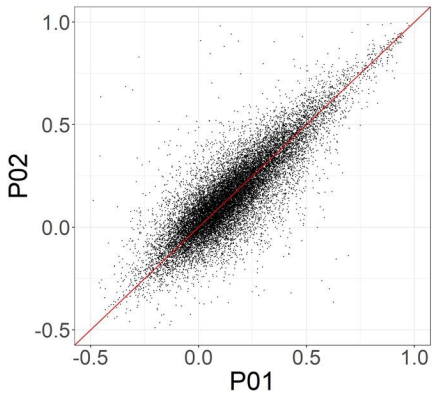

$r = 0.5$

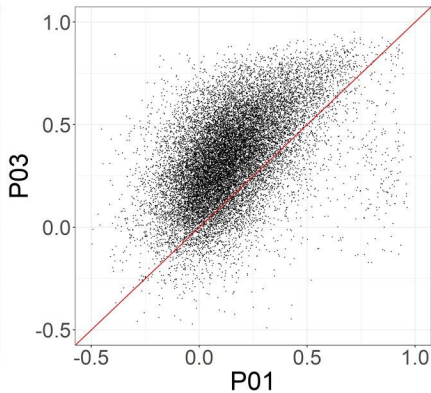

$r = 0.813$

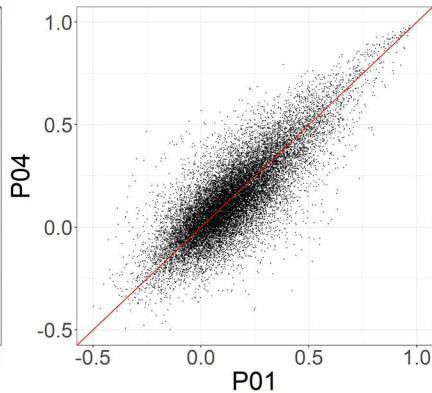

$r = 0.527$

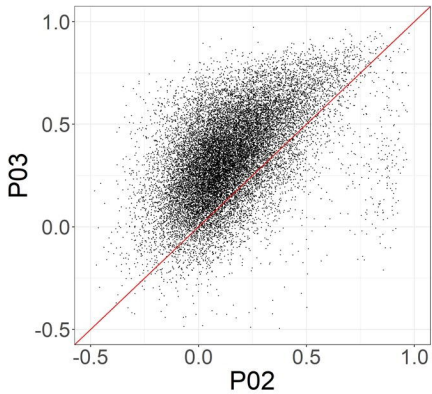

$r = 0.92$

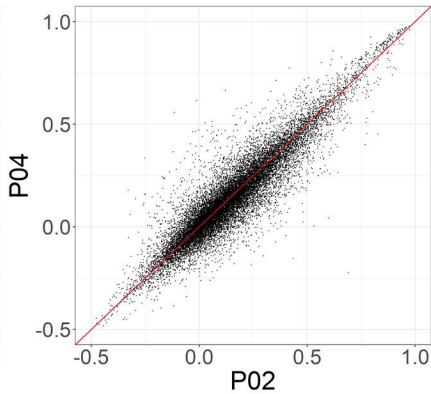

$r = 0.502$

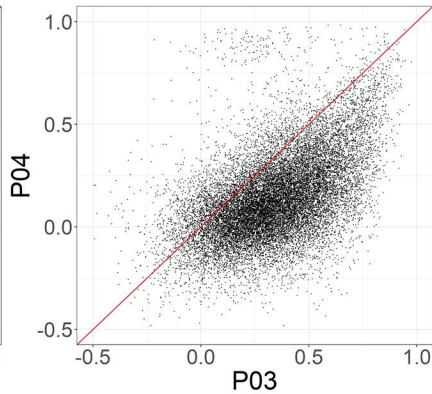



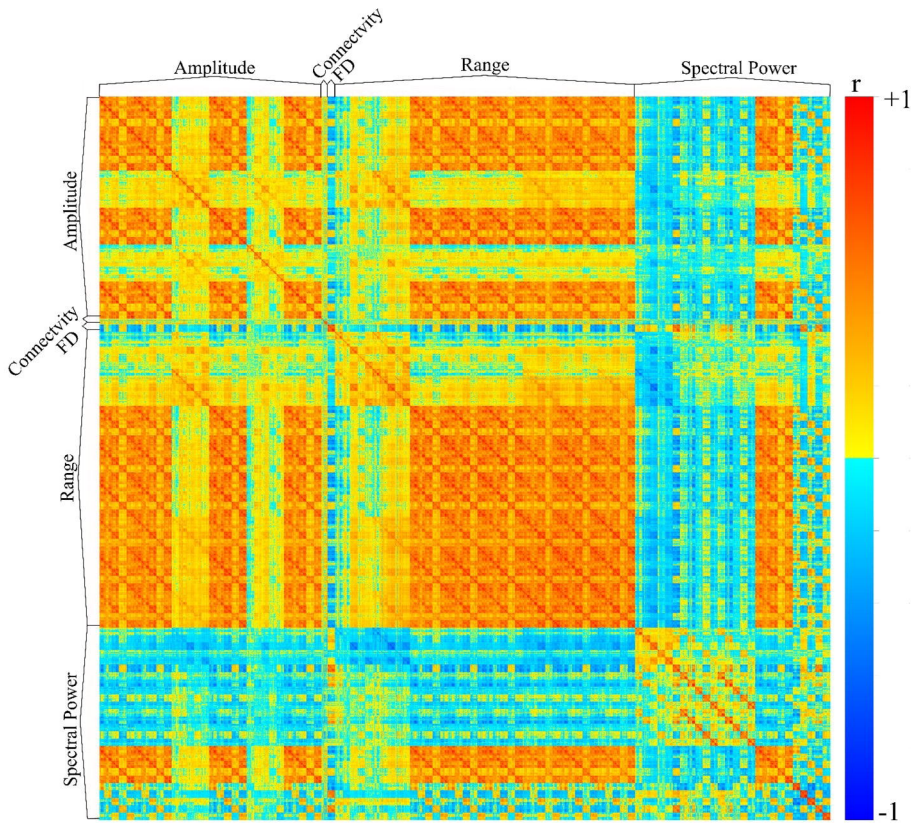

Source: https://www.medrxiv.org/content/medrxiv/early/2021/03/20/2021.03.16.21253726.full.pdf
